# Supplementary material for: The Influence of Environmental Variables on Home Range Size and Use in the Golden Snub-Nosed Monkey (Rhinopithecus roxellana) in Tangjiahe National Nature Reserve, China
Source: MDPI journal article supplement (doi:10.3390/ani12182338), 2022-09-08
Supplement: s1 [file s1]

Table S2: Recorded foraged tree species and diet parts of the golden snub-nosed monkey in Tangjiahe National Nature Reserve, China, from November 2015 to October 2016. N, No. of sam-pling quadrats

| Month (N)    | Foraged tree species (frequency)  | Diet parts (frequency)           |
|--------------|-----------------------------------|----------------------------------|
| January (17) | <i>Salix wallichiana</i> (5)      | Bark (6) Bud (2)                 |
|              | <i>Acer cappadocicum</i> (1)      | Bark (1)                         |
|              | <i>Betula utilis</i> (2)          | Bark (2) Bud (1)                 |
|              | <i>Acer caudatum</i> (1)          | Bark (1)                         |
|              | <i>Acer laxiflorum</i> (2)        | Bark (2) Bud (1)                 |
|              | <i>Fagus longipetiolata</i> (2)   | Bark (2) Bud (2)                 |
|              | <i>Amygdalus persica</i> (1)      | Bark (1)                         |
|              | <i>Cyclobalanopsis glauca</i> (2) | Bark (2)                         |
|              | <i>Litsea chunii</i> (1)          | Bark (1)                         |
| February (8) | <i>Betula utilis</i> (5)          | Bark (5) Bud (3)                 |
|              | <i>Litsea chunii</i> (2)          | Bark (2) Bud (2)                 |
|              | <i>Rosa</i> sp. (1)               | Bark (1) Bud (1)                 |
|              | <i>Populus cathayana</i> (1)      | Bark (1) Bud (1)                 |
| March (27)   | <i>Acer cappadocicum</i> (5)      | Bark (5) Bud (3) Tender leaf (4) |
|              | <i>Picea brachytyla</i> (1)       | Bark (1)                         |
|              | <i>Betula utilis</i> (5)          | Bark (5) Bud (1)                 |
|              | <i>Amygdalus persica</i> (1)      | Bark (1) Bud (1)                 |
|              | <i>Acer franchetii</i> (2)        | Bark (2) Bud (2)                 |
|              | <i>Populus cathayana</i> (2)      | Bark (2) Bud (1)                 |
|              | <i>Lindera Limprichtii</i> (2)    | Mature leaf (2)                  |
|              | <i>Litsea chunii</i> (1)          | Bark (1) Bud (1)                 |
|              | <i>Ilex fargesii</i> (1)          | Bark (1)                         |
|              | <i>Fagus longipetiolata</i> (2)   | Bark (2)                         |
|              | <i>Abies faxoniana</i> (2)        | Bark (2)                         |
|              | <i>Quercus aquifolioides</i> (1)  | Bark (1)                         |

|             |                                   |                                            |
|-------------|-----------------------------------|--------------------------------------------|
| April (15)  | <i>Abies faxoniana</i> (3)        | Bark (3)                                   |
|             | <i>Betula utilis</i> (4)          | Bark (4) Bud (4)                           |
|             | <i>Salix wallichiana</i> (2)      | Bark (2) Bud (2)                           |
|             | <i>Tilia chinensis</i> (1)        | Bud (1) Tender leaf (1)                    |
|             | <i>Cyclobalanopsis glauca</i> (2) | Bud (2) Tender leaf (2)                    |
|             | <i>Betula albo</i> (2)            | Bud (1) Tender leaf (2)                    |
|             | <i>Quercus aquifolioides</i> (1)  | Bark (1)                                   |
| May (49)    | <i>Picea brachytyla</i> (31)      | Bark (31) Bud (11) Tender leaf (2)         |
|             | <i>Betula utilis</i> (8)          | Bark (8) Bud (6)                           |
|             | <i>Abies faxoniana</i> (5)        | Bark (5) Bud (3)                           |
|             | <i>Quercus aliena</i> (1)         | Bark (1) Tender leaf (1)                   |
|             | <i>Quercus aquifolioides</i> (1)  | Bark (1) Bud (1)                           |
|             | <i>Salix wallichiana</i> (1)      | Bark (1) Bud (1)                           |
|             | <i>Quercus aliena</i> (1)         | Bud (1)                                    |
|             | <i>Cerasus duclouxii</i> (1)      | Bark (1) Bud (1)                           |
|             | <i>Acer oliverianum</i> (1)       | Bark (1) Bud (1)                           |
|             | <i>Abies faxoniana</i> (4)        | Bark (4) Bud (3)                           |
| June (6)    | <i>Picea brachytyla</i> (1)       | Bark (1)                                   |
|             | <i>Tilia chinensis</i> (1)        | Bark (31) Bud (11) Tender leaf (2)         |
|             | <i>Picea brachytyla</i> (2)       | Bark (2)                                   |
| July (19)   | <i>Abies faxoniana</i> (4)        | Bark (4) Bud (1)                           |
|             | <i>Litsea chunii</i> (2)          | Fruit (2)                                  |
|             | <i>Salix wallichiana</i> (3)      | Bark (2) Bud (1) Tender leaf (2)           |
|             | <i>Tilia chinensis</i> (5)        | Bark (3) Bud (1) Tender leaf (3) Fruit (1) |
|             | <i>Sorbus</i> sp. (1)             | Bark (1) Tender leaf (1)                   |
|             | <i>Betula albo</i> (1)            | Tender leaf (1)                            |
|             | <i>Fagus longipetiolata</i> (1)   | Bark (1) Bud (1) Tender leaf (1)           |
| August (14) | <i>Litsea chunii</i> (6)          | Fruit (6)                                  |

|                |                                   |                                            |
|----------------|-----------------------------------|--------------------------------------------|
|                | <i>Betula albo</i> (2)            | Bark (1) Tender leaf (1)                   |
|                | <i>Salix wallichiana</i> (2)      | Bark (2)                                   |
|                | <i>Tilia chinensis</i> (2)        | Mature leaf (2)                            |
|                | <i>Fagus longipetiolata</i> (1)   | Bark (1) Mature leaf (1)                   |
|                | <i>Betula utilis</i> (1)          | Bark (1)                                   |
|                | <i>Fargesia denudata</i> (8)      | Bud (8)                                    |
| September (35) | <i>Quercus aliena</i> (16)        | Bark (4) Mature leaf (2) Fruit (13)        |
|                | <i>Fagus longipetiolata</i> (4)   | Bark (2) Mature leaf (1) Fruit (3)         |
|                | <i>Picea brachytyla</i> (1)       | Bark (1) Mature leaf (1)                   |
|                | <i>Tilia chinensis</i> (1)        | Bark (1) Fruit (1)                         |
|                | <i>Salix wallichiana</i> (3)      | Bark (3)                                   |
|                | <i>Cyclobalanopsis glauca</i> (4) | Bark (1) Mature leaf (1) Fruit (2)         |
|                | <i>Betula utilis</i> (1)          | Bark (2)                                   |
|                | <i>Pinus massoniana</i> (1)       | Bark (1)                                   |
|                | <i>Elaeagnus umbellate</i> (1)    | Fruit (1)                                  |
|                | <i>Quercus aliena</i> (1)         | Fruit (1)                                  |
| October (59)   | <i>Quercus aliena</i> (14)        | Bark (3) Fruit (14)                        |
|                | <i>Salix wallichiana</i> (16)     | Bark (14) Mature leaf (7)                  |
|                | <i>Tilia chinensis</i> (12)       | Bark (5) Mature leaf (8) Fruit (9) Bud (1) |
|                | <i>Betula utilis</i> (1)          | Mature leaf (1) Bud (1)                    |
|                | <i>Betula albo</i> (1)            | Bark (1)                                   |
|                | <i>Sorbus</i> sp. (3)             | Fruit (3)                                  |
|                | <i>Betula albo-sinensis</i> (1)   | Mature leaf (1)                            |
|                | <i>Acer caudatum</i> (1)          | Bark (1)                                   |
|                | <i>Abies faxoniana</i> (1)        | Bark (1)                                   |
|                | <i>Elaeagnus umbellate</i> (3)    | Fruit (3)                                  |
|                | <i>Litsea chunii</i> (2)          | Bark (2) Fruit (2)                         |
|                | <i>Cyclobalanopsis glauca</i> (2) | Fruit (2)                                  |

|              |                                |                          |
|--------------|--------------------------------|--------------------------|
|              | <i>Salix eriostachya</i> (1)   | Bark (1)                 |
|              | <i>Populus cathayana</i> (1)   | Bark (1)                 |
|              | <i>Cerasus szechuanica</i> (1) | Bark (1)                 |
| November (8) | <i>Salix wallichiana</i> (6)   | Bark (6) Mature leaf (1) |
|              | <i>Tilia chinensis</i> (1)     | Bark (1) Mature leaf (1) |
|              | <i>Betula utilis</i> (1)       | Bark (1) Mature leaf (1) |
| December (5) | <i>Populus cathayana</i> (2)   | Mature leaf (2)          |
|              | <i>Lonicera ligustrina</i> (1) | Bark (1)                 |
|              | <i>Rosa</i> sp. (1)            | Bark (1)                 |
|              | <i>Salix wallichiana</i> (1)   | Bark (1)                 |

---
