# Supplementary material for: The Influence of Environmental Variables on Home Range Size and Use in the Golden Snub-Nosed Monkey (Rhinopithecus roxellana) in Tangjiahe National Nature Reserve, China
Source: MDPI journal article supplement (doi:10.3390/ani12182338), 2022-09-08
Supplement: s1 [file s1]

Table S3: The regression analysis of canonical axis produced by positive MEM variables on environmental variables in Tangjiahe National Nature Reserve, China, November 2015 to October 2016. The environmental variables with the positive coefficient values suggested a positive influence on the spatial predictors, and the negative coefficient values suggested a negative effect.

| Seasons | Environmental variables                       | Coefficient | Intercept | t     | P       |
|---------|-----------------------------------------------|-------------|-----------|-------|---------|
| Spring  | Dominant trees of <i>Pinus massoniana</i>     | 0.55        | 0.15      | 3.02  | 0.007   |
| Summer  | Primary forest                                | 0.34        | -0.59     | 2.59  | 0.025   |
|         | Dominant trees of <i>Fagus longipetiolata</i> | -0.29       | -0.59     | -3.64 | 0.004   |
| Autumn  | Altitude                                      | 0.0003      | -0.59     | 2.07  | 0.043   |
| Winter  | Dominant trees of <i>Tilia tuan</i>           | -0.73       | 0.44      | -4.85 | < 0.001 |
