# Supplementary material for: The Influence of Environmental Variables on Home Range Size and Use in the Golden Snub-Nosed Monkey (Rhinopithecus roxellana) in Tangjiahe National Nature Reserve, China
Source: MDPI journal article supplement (doi:10.3390/ani12182338), 2022-09-08
Supplement: s1 [file s1]

Table S1. The frequency with which golden snub-nosed monkeys entered 200 m × 200 m grid cells in Tangjiahe National Nature Reserve, China, November 2015 to October 2016.

| Seasons | Frequency of entering grid cells |       |             |                    |
|---------|----------------------------------|-------|-------------|--------------------|
|         | Once                             | Twice | Three times | Four or more times |
| Spring  | 183                              | 102   | 25          | 16                 |
| Summer  | 108                              | 88    | 45          | 14                 |
| Autumn  | 108                              | 103   | 42          | 22                 |
| Winter  | 187                              | 97    | 49          | 22                 |
| Annual  | 210                              | 113   | 103         | 102                |
